# Supplementary material
Source: MDPI journal article supplement (https://www.mdpi.com/2071-1050/7/8/10250)
Supplement: s1 [file s1]

## Sheet: Country codes
CODE	COUNTRY
ALB	Albania
AGO	Angola
ATG	Antigua and Barbuda
ARG	Argentina
AZE	Azerbaijan
BHS	Bahamas, The
BGD	Bangladesh
BLZ	Belize
BEN	Benin
BTN	Bhutan
BOL	Bolivia
BWA	Botswana
BRA	Brazil
BFA	Burkina Faso
BDI	Burundi
KHM	Cambodia
CMR	Cameroon
CAF	Central African Republic
TCD	Chad
CHL	Chile
CHN	China
COL	Colombia
COD	Congo, Rep.
CRI	Costa Rica
CIV	Côte D'ivoire
CUB	Cuba
DMA	Dominica
DOM	Dominican Republic
ECU	Ecuador
SLV	El Salvador
GNQ	Equatorial Guinea
ETH	Ethiopia
FJI	Fiji
GAB	Gabon
GEO	Georgia
GHA	Ghana
GRD	Grenada
GTM	Guatemala
GIN	Guinea
GNB	Guinea-Bissau
GUY	Guyana
HTI	Haiti
HND	Honduras
IND	India
IDN	Indonesia
IRN	Iran, Islamic Rep.
JAM	Jamaica
KAZ	Kazakhstan
KEN	Kenya
KGZ	Kyrgyz Republic
LAO	Lao Pdr
LBN	Lebanon
LBR	Liberia
MDG	Madagascar
MWI	Malawi
MYS	Malaysia
MLI	Mali
MEX	Mexico
MNG	Mongolia
MAR	Morocco
MOZ	Mozambique
NAM	Namibia
NPL	Nepal
NIC	Nicaragua
NGA	Nigeria
PAK	Pakistan
PAN	Panama
PNG	Papua New Guinea
PRY	Paraguay
PER	Peru
PHL	Philippines
RWA	Rwanda
WSM	Samoa
STP	São Tomé And Principe
SEN	Senegal
SLE	Sierra Leone
SLB	Solomon Islands
LKA	Sri Lanka
LCA	St. Lucia
SDN	Sudan
SUR	Suriname
SYR	Syrian Arab Republic
THA	Thailand
TLS	Timor-Leste
TGO	Togo
TUN	Tunisia
UGA	Uganda
VUT	Vanuatu
VNM	Vietnam
ZMB	Zambia
ZWE	Zimbabwe

## Sheet: Data
Code	Voice and Accountability	Political Stability No Violence	Government Effectiveness	Regulatory Quality	Rule of Law	Control of Corruption	Mean of Rule of Law and Control of Corruption	REDD in GDP
ALB	0.038705	0.0580387	-0.333543	0.175412	-0.574116	-0.716585	-0.64535	0.000157935
AGO	-1.12029	-0.372164	-1.25554	-1.05215	-1.2796	-1.3248	-1.3022	1.44165e-05
ATG	0.64654	0.977781	0.481298	0.597542	0.862015	1.28598	1.074	0.0021987
ARG	0.236741	0.0597167	-0.290122	-0.989135	-0.731709	-0.459179	-0.595444	1.43491e-05
AZE	-1.35397	-0.410394	-0.455134	-0.426557	-0.673663	-0.901317	-0.78749	8.0478e-05
BHS	0.905113	1.12091	0.862348	0.156202	0.598143	1.35659	0.977365	0.000350274
BGD	-0.423403	-1.61277	-0.819853	-0.927499	-0.83167	-0.890837	-0.861253	1.71349e-05
BLZ	0.701983	0.173442	-0.185188	-0.492391	-0.448815	0.0183829	-0.215216	0.00390877
BEN	0.115245	0.280325	-0.553643	-0.423893	-0.632346	-0.825234	-0.72879	0.00218412
BTN	-0.183027	0.7998	0.358735	-1.09748	0.243197	0.823723	0.53346	0.00235788
BOL	-0.102699	-0.347588	-0.397995	-0.788088	-1.07107	-0.588819	-0.829946	0.00127319
BWA	0.471308	1.05636	0.277715	0.655861	0.593087	0.922231	0.757659	3.13766e-05
BRA	0.367181	-0.278287	-0.0790377	0.0654066	-0.119388	-0.115272	-0.11733	0.000820944
BFA	-0.294113	-0.752726	-0.617247	-0.167164	-0.526609	-0.57933	-0.552969	0.00648309
BDI	-0.965074	-1.29788	-1.0748	-0.871221	-1.06202	-1.38627	-1.22414	0.0106076
KHM	-0.979919	-0.155668	-0.922474	-0.351664	-0.989789	-1.01307	-1.00143	0.00213798
CMR	-1.04192	-0.517818	-0.864772	-0.929715	-1.04586	-1.19218	-1.11902	0.00205516
CAF	-1.52873	-2.14581	-1.78089	-1.12833	-1.83424	-1.04146	-1.43785	0.0429955
TCD	-1.38387	-1.10078	-1.49598	-1.01546	-1.37247	-1.28494	-1.32871	0.000233097
CHL	1.09182	0.373459	1.24502	1.4808	1.33844	1.51704	1.42774	5.68066e-05
CHN	-1.57691	-0.546091	-0.0292644	-0.306941	-0.455931	-0.354171	-0.405051	1.9535e-05
COL	-0.116322	-1.26858	0.042561	0.387844	-0.448543	-0.437384	-0.442964	0.000263393
COD	-1.12481	-0.466123	-1.22259	-1.35722	-1.0924	-1.18713	-1.13976	0.0222576
CRI	1.04968	0.666129	0.470162	0.576422	0.495559	0.593875	0.544717	0.0025053
CIV	-0.767582	-1.05128	-1.03611	-0.731151	-0.93199	-0.787146	-0.859568	0.00238747
CUB	-1.39546	0.369455	-0.440126	-1.61936	-0.627535	0.123125	-0.252205	1.08685e-05
DMA	0.992497	1.20068	0.711616	0.268903	0.633901	0.693847	0.663874	0.00245806
DOM	0.0842058	0.186578	-0.491943	-0.106972	-0.532523	-0.846266	-0.689395	0.000202949
ECU	-0.286393	-0.195424	-0.486265	-0.942811	-0.950371	-0.609578	-0.779975	0.00110321
SLV	-0.0460836	-0.0435232	-0.130828	0.306211	-0.675337	-0.348085	-0.511711	0.000161836
GNQ	-1.96224	0.0809061	-1.59132	-1.43688	-1.31777	-1.60881	-1.46329	0.000135171
ETH	-1.2929	-1.39419	-0.519465	-1.13417	-0.621725	-0.502809	-0.562267	0.000988904
FJI	-0.811893	-0.0266337	-0.957459	-0.57246	-0.841399	-0.403245	-0.622322	0.0020752
GAB	-0.8577	0.33724	-0.768723	-0.564724	-0.516483	-0.557251	-0.536867	0.00208467
GEO	0.0993549	-0.463913	0.532519	0.735287	-0.0248656	0.355164	0.165149	0.000146746
GHA	0.410659	0.0204064	-0.0860762	0.0779648	0.10851	-0.0742412	0.0171344	0.00305641
GRD	0.819352	0.41847	0.269459	0.354777	0.156648	0.41118	0.283914	0.00362832
GTM	-0.403575	-0.694917	-0.712314	-0.212091	-1.11172	-0.576996	-0.844357	0.000667542
GIN	-1.0648	-1.22576	-1.32004	-1.00788	-1.42145	-1.06005	-1.24075	0.000128149
GNB	-1.41419	-0.932128	-1.4386	-1.30124	-1.62272	-1.32986	-1.47629	0.0019337
GUY	-0.00874708	-0.441667	-0.163449	-0.615004	-0.524984	-0.644957	-0.58497	0.141564
HTI	-0.789555	-0.662892	-1.53043	-0.945879	-1.29921	-1.15486	-1.22704	0.00102807
HND	-0.507303	-0.466071	-0.743677	-0.199423	-1.22849	-0.95028	-1.08938	0.000406889
IND	0.411728	-1.18747	-0.189874	-0.473322	-0.0989954	-0.559838	-0.329417	4.09174e-05
IDN	0.00251646	-0.50047	-0.237974	-0.197142	-0.554428	-0.621893	-0.58816	0.000715701
IRN	-1.60011	-1.26921	-0.696537	-1.49891	-0.982732	-0.680197	-0.831464	2.36939e-06
JAM	0.497963	0.176125	-0.016091	0.226105	-0.387032	-0.367557	-0.377295	0.000668418
KAZ	-1.22437	-0.381383	-0.537022	-0.383045	-0.666975	-0.898436	-0.782706	1.12129e-05
KEN	-0.241876	-1.14823	-0.486429	-0.353489	-0.743896	-1.06407	-0.903981	0.000752806
KGZ	-0.565441	-0.910442	-0.693125	-0.329098	-1.13859	-1.12494	-1.13176	0.00074301
LAO	-1.58769	0.0647826	-0.758521	-0.849738	-0.76938	-0.89937	-0.834375	0.0122231
LBN	-0.440679	-1.69493	-0.391327	-0.0862061	-0.776288	-0.924912	-0.8506	0.000108817
LBR	-0.447203	-0.461519	-1.33345	-0.91605	-0.915628	-0.67756	-0.796594	0.0106701
MDG	-0.780142	-0.714349	-1.12378	-0.669555	-0.897314	-0.689096	-0.793205	0.00129496
MWI	-0.187308	-0.224158	-0.560658	-0.680026	-0.190432	-0.636483	-0.413458	0.0225872
MYS	-0.320525	0.0517821	1.10038	0.616533	0.475909	0.406562	0.441235	0.000138163
MLI	-0.30247	-1.68542	-0.839029	-0.502207	-0.749709	-0.72532	-0.737515	0.00195201
MEX	0.0793591	-0.737591	0.307372	0.458198	-0.577907	-0.476364	-0.527135	0.00134991
MNG	0.0729997	0.499276	-0.541063	-0.285949	-0.369657	-0.462237	-0.415947	0.000603577
MAR	-0.722443	-0.499976	-0.0734945	-0.169256	-0.247642	-0.35616	-0.301901	4.81163e-06
MOZ	-0.286721	-0.27106	-0.648781	-0.412409	-0.846573	-0.649699	-0.748136	0.00478733
NAM	0.386834	0.929438	0.193423	0.0521321	0.249342	0.295801	0.272571	5.8768e-05
NPL	-0.56846	-1.14146	-0.927363	-0.865825	-0.755773	-0.677267	-0.71652	0.00469662
NIC	-0.447759	-0.247	-0.816507	-0.304761	-0.646478	-0.731064	-0.688771	0.00154999
NGA	-0.744428	-2.07935	-1.0093	-0.705946	-1.15766	-1.19671	-1.17718	2.27783e-05
PAK	-0.831053	-2.59472	-0.800311	-0.713274	-0.879249	-0.933547	-0.906398	9.41853e-05
PAN	0.40842	-0.133664	0.321301	0.370164	-0.239743	-0.361371	-0.300557	0.000478919
PNG	0.0174882	-0.524541	-0.712524	-0.51984	-0.977332	-1.03886	-1.0081	0.00260137
PRY	-0.133347	-0.670033	-0.880651	-0.319718	-0.822719	-1.03799	-0.930354	0.000826012
PER	0.037614	-0.77207	-0.142405	0.452029	-0.609442	-0.437862	-0.523652	0.000326859
PHL	-0.0121283	-1.05949	0.0592926	-0.0716598	-0.427092	-0.400744	-0.413918	0.000367653
RWA	-1.17879	-0.084214	-5.21366e-05	0.0329537	-0.147705	0.647295	0.249795	0.00569281
WSM	0.470942	1.00883	0.135737	-0.234285	0.718967	0.19516	0.457064	0.00327911
STP	0.107475	0.122036	-0.735404	-0.814223	-0.8235	-0.382163	-0.602831	0.0169772
SEN	0.0345991	-0.0863558	-0.478566	-0.0481493	-0.272892	-0.281965	-0.277429	0.000751536
SLE	-0.385294	-0.152704	-1.14458	-0.689416	-0.877309	-0.899722	-0.888516	0.0016867
SLB	-0.0188212	0.37246	-0.855061	-1.13286	-0.603456	-0.451545	-0.527501	0.00748941
LKA	-0.618976	-0.606286	-0.232523	-0.161771	-0.271458	-0.227087	-0.249273	5.95184e-05
LCA	1.17729	0.869094	0.965047	0.418103	0.745194	1.17321	0.959199	0.00174568
SDN	-1.77512	-2.20086	-1.5314	-1.44374	-1.25249	-1.48825	-1.37037	6.1672e-05
SUR	0.306058	0.158451	0.00497319	-0.341774	-0.0887825	-0.381531	-0.235157	0.000763571
SYR	-1.77303	-2.68487	-1.34004	-1.60553	-1.47667	-1.23929	-1.35798	4.45489e-06
THA	-0.432467	-1.32214	0.212644	0.213089	-0.13342	-0.33024	-0.23183	5.36895e-05
TLS	0.0499749	-0.387745	-1.25867	-0.992921	-1.26895	-0.843545	-1.05625	0.00105586
TGO	-0.979007	-0.426723	-1.37093	-0.950878	-1.00896	-1.04469	-1.02682	0.00303868
TUN	-0.114188	-0.912689	-0.000213713	-0.346258	-0.201469	-0.147826	-0.174647	0.000258965
UGA	-0.549072	-0.840626	-0.580174	-0.236696	-0.357075	-1.05066	-0.703868	0.000503152
VUT	0.514917	1.18973	-0.213686	-0.552491	0.279833	0.376163	0.327998	0.0127677
VNM	-1.33619	0.224132	-0.299343	-0.654935	-0.487229	-0.534026	-0.510627	0.000864223
ZMB	-0.111897	0.389406	-0.475394	-0.467772	-0.306414	-0.386863	-0.346638	0.000856052
ZWE	-1.38558	-0.690242	-1.13851	-1.79616	-1.56784	-1.36514	-1.46649	0.000652324

## Sheet: Sources of data
The share of REDD+ payments scheduled for 2006–2022 in GDP (2013) comes from the Voluntary REDD+ Database: http://reddplusdatabase.org (as of mid-2015) [13]
GDP data comes from: http://data.worldbank.org/data-catalog/world-development-indicators [14]
The World Bank’s governance indices (2013) come from: http://info.worldbank.org/governance/wgi [16]
Country codes are defined by the International Organisation for Standardisation (ISO 3166-1) [17]
